# Supplementary material
Source: publisher site journal article supplement (https://www.dovepress.com/article/369412)
Supplement: Supplementary file 1 [file get_supplementary_file.php]

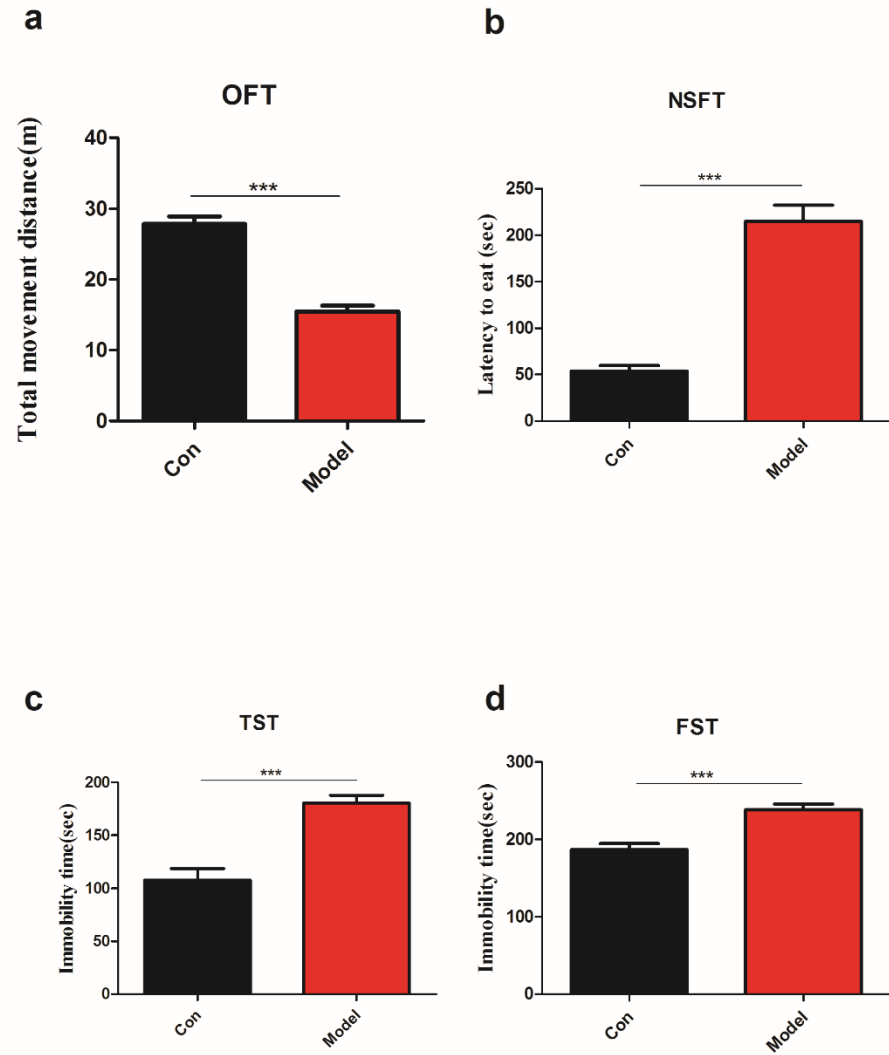

Supplementary Figure 1. The successful establishment of CUMS model was validated by the open-field test (OFT), forced swim test (FST), novelty suppressed feeding test (NSFT) and tail suspension test (TST). \*\*\*  $p < 0.001$ .
